# Supplementary material for: Efficient removal of short-chain and long-chain PFAS by cationic nanocellulose
Source: Royal Society of Chemistry journal article supplement (doi:10.1039/d3ta01851b), 2023-01-01
Supplement: d3ta01851b1.pdf [file d3ta01851b1.pdf]

## Supporting Information

### Efficient Removal of Short-Chain and Long-Chain PFAS by Cationic Nanocellulose

Duning Li<sup>1</sup>, Cheng-Shiuan Lee<sup>2,3</sup>, Yi Zhang<sup>2</sup>, Rasel Das<sup>1</sup>, Fahmida Akter<sup>1</sup>,  
Arjun K. Venkatesan<sup>2,4,\*</sup>, and Benjamin S. Hsiao<sup>1,\*</sup>

<sup>1</sup>Department of Chemistry, Stony Brook University, Stony Brook, NY 11790, USA

<sup>2</sup>New York State Center for Clean Water Technology, Stony Brook University, Stony Brook,  
NY 11794, USA

<sup>3</sup>Research Center for Environmental Changes, Academia Sinica, Taipei 115, Taiwan

<sup>4</sup>School of Marine and Atmospheric Sciences, Stony Brook University, Stony Brook, NY  
11794, USA

\*Corresponding authors:

Email address: [arjun.venkatesan@stonybrook.edu](mailto:arjun.venkatesan@stonybrook.edu) (A. K. Venkatesan),

[benjamin.hsiao@stonybrook.edu](mailto:benjamin.hsiao@stonybrook.edu) (B. S. Hsiao)

## CONTENTS

### Text:

**Text S1.** Fourier-Transform Infrared Spectroscopy (FTIR)

**Text S2.** X-Ray Diffraction (XRD)

**Text S3.** Conductivity Titration

**Text S4.** Zeta Potential Measurement

**Text S5.** Surface Area Measurement

**Text S6.** Electron Microscopy

### Figures:

**Figure S1.** Zeta potential values for QNC 12:1 under different pH values.

**Figure S2.** Zeta potential values for QNC 12:1 after PFOA adsorption.

**Figure S3.** XRD profiles for wood pulp, QNC 9:1-a, QNC 9:1-b and QNC 12:1.

**Figure S4.** NaCl ion test for four different PFASs on QNC.

### Tables:

**Table S1.** Basic information for the ground water sample in Long Island, NY.

**Table S2.** The PFAS quantitatively analysis results using the ground water (GW) samples.

**Table S3.** LC-MS/MS operating conditions and corresponding parameters.

**Table S4.** Precursor and product ions of PFAS: (a) native compounds and (b) corresponding internal standards. Product ion 1 is for quantification and product ion 2 is for confirmation.

**Table S5.** The kinetic data for (a) PFOA; (b) PFBA; (c) PFOS; (d) PFBS.

**Table S6.** The isotherm data for (a) PFOA; (b) PFBA; (c) PFOS; (d) PFBS.

**Table S7.** The displacement study for (a) PFBS/PFOS system; (b) PFBA/PFOA system.

**Table S8.** The competition study for (a) PFBS/PFOS system; (b) PFBA/PFOA system.

**Table S9.** Adsorption experiment with 1 mM and 0.1M NaCl ion

### **Text S1. Fourier-Transform Infrared Spectroscopy (FTIR)**

ALPHA FT-IR Spectrometer (Bruker Optics Inc.) was used to detect the functional groups of wood pulp and QNC samples over the wavelength range of 400-4000  $\text{cm}^{-1}$ s. The attenuated total reflectance (ATR) mode was used to study the samples in the solid form.

### **Text S2. X-Ray Diffraction (XRD)**

XRD patterns of varying samples were measured by a Rigaku MiniFlex 600 Benchtop X-ray Diffractometer with diffraction angle from  $5^\circ \leq 2\theta \leq 40^\circ$  at a scanned rate of  $10^\circ\text{min}^{-1}$ . The instrument was powered by the Cu  $K\alpha$  radiation ( $\lambda = 0.154$  nm through a Ni filter) generated at 40 kV and 40 mA. The crystallinity index (CI) was calculated as the ratio between the area of the crystalline peaks ( $A_{cr}$ ) and the total area ( $A_{total}$ ) under the diffraction profile, as expressed by the following equation:

$$CI = \frac{A_{cr}}{A_{total}} \times 100\% \quad (1)$$

Individual crystalline peaks were extracted by the peak deconvolution method. The chosen peak fitting program was developed in Python, which utilized Lorentzian functions to fit each crystalline peak. A broad background peak attributed to the amorphous phase centered around  $21.5^\circ$  ( $1.52 \text{ \AA}^{-1}$ ) was also fitted with a Gaussian function.<sup>1</sup> The XRD data indicated the all observed crystal structure was cellulose I.<sup>2</sup>

### **Text S3. Conductivity Titration**

Conductivity titration on the QNC suspension was carried out as follows. About 100 mL of 0.01 M silver nitrate solution was prepared prior the titration. Subsequently, 50 mL of

0.03 wt% QNC suspension was stirred for 10 min and was titrated with 0.5 mL silver nitrate at a 30 s interval. The number of quaternary ammonium groups equal to the chloride ions was determined by the volume of silver nitrate used for each sample.<sup>3</sup>

#### **Text S4. Zeta Potential Measurement**

A Zetaprobe Analyzer (Colloid Dynamics, LLC) was used to measure the zeta potential of wood pulp and QNC samples. The probe was first washed and calibrated using the standard zeta probe polar solution (KSiW 0.26 mS/m solution). Then around 280 mL of 0.1 wt% QNC suspension was filled in the sample holder to conduct 10 consecutive measurements under magnetic stirring. The reported zeta potential value was based on the average number of 10 measurements at pH = 6-7. For the measurement under different pH condition, 0.1 mol of HCl and NaOH was used to adjust the pH level from 2-10.

#### **Text S5. Surface Area Measurement**

The surface area of QNC samples was determined by the N<sub>2</sub> adsorption isotherm curve using Quantachrome NOVAtouch LX2 analyzer, equipped with degasser and Brunauer–Emmett–Teller (BET) analyzer units. Before the measurement, the sample went through the degassing process at 100 °C (initiated at a heated rate of 10 °C/min) for 12 h under a dry N<sub>2</sub> gas flow. The full BET isotherm measurement (0.05 – 0.99  $P/P_o$ , where  $P/P_o$  represents the relative pressure) was performed under helium using the fine powder model, where the specific surface area was analyzed by applying the multi-points BET adsorption–desorption isotherm model in the range of 0.05 – 0.35  $P/P_o$ .

## Text S6. Electron Microscopy

To study the morphology and fiber size of the pristine cellulose and QNC, scanning electron microscope (SEM) (Hitachi 4800, Japan) and transmission electron microscope (TEM) (JEOL 1400 LaB6 Soft Bio TEM, Japan) were used, respectively. Air dried pristine cellulose and freeze-dried QNC were selected for SEM analysis. For TEM measurements, samples were prepared by using 0.005% concentration and 10  $\mu\text{L}$  of QNC suspension, casted on copper grids (300 mesh, Ted Pella Inc.). All TEM samples were stained using a 0.2  $\mu\text{L}$  of 2.0 wt% uranyl acetate solution.

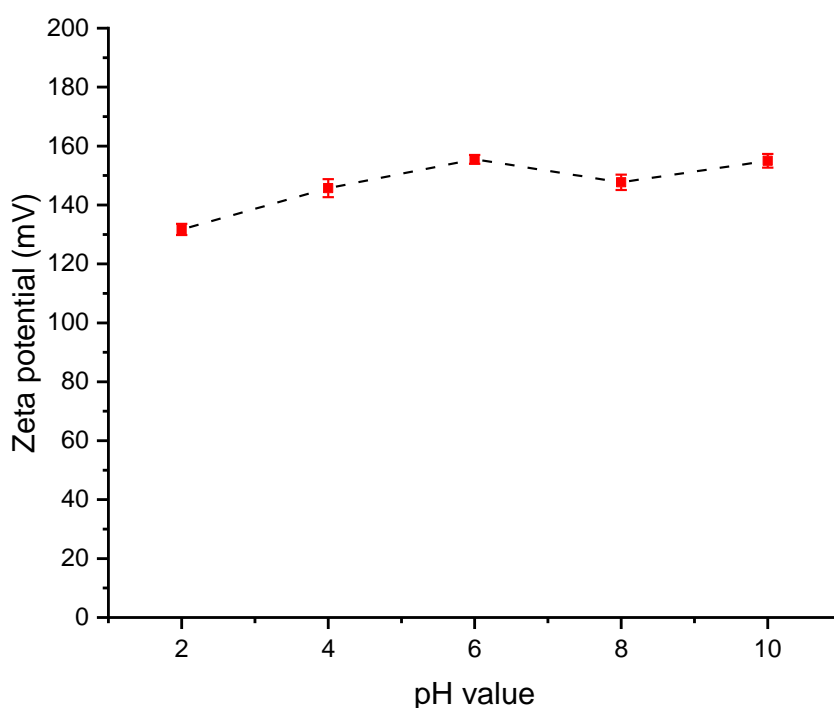

**Figure S1.** Zeta potential values for QNC 12:1 under different pH values.

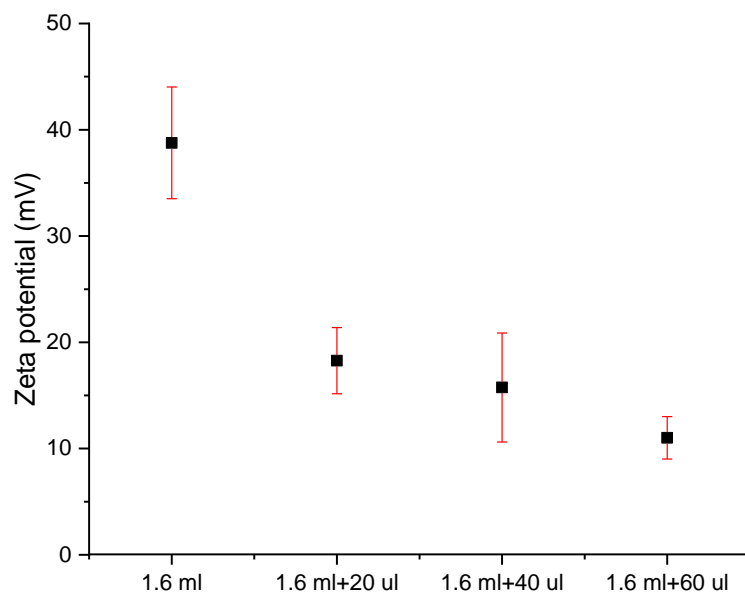

**Figure S2.** Zeta potential values for QNC 12:1 after PFOA adsorption. (1.6 mL 0.03 wt% of QNC plus 20, 40 and 60  $\mu$ l of 1g/L PFOA)

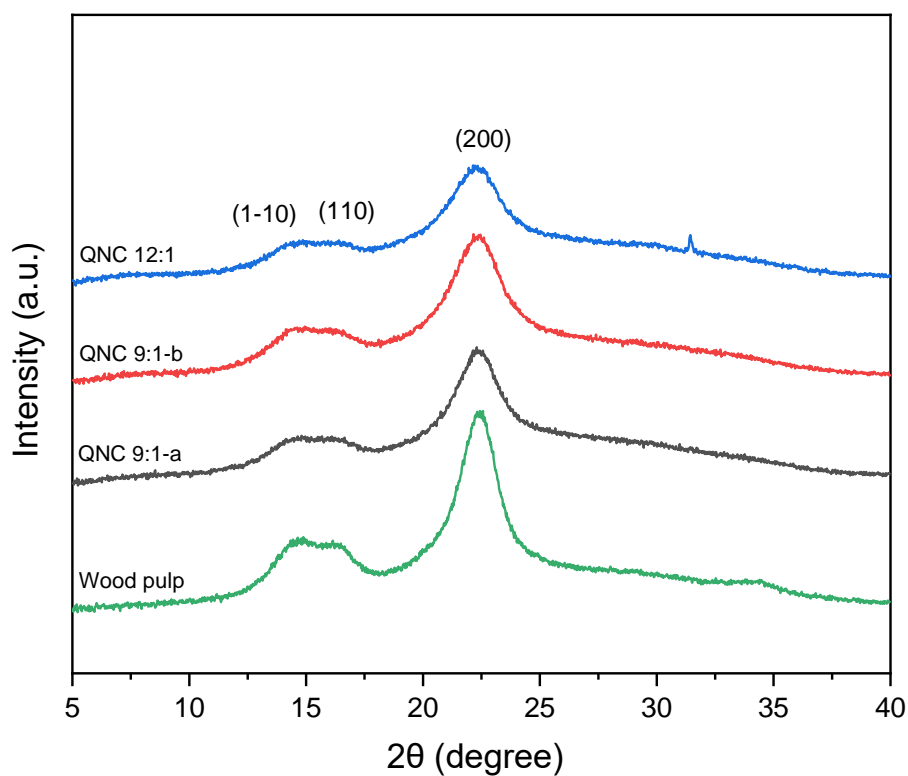

**Figure S3.** XRD profiles for wood pulp, QNC 9:1-a, QNC 9:1-b and QNC 12:1.

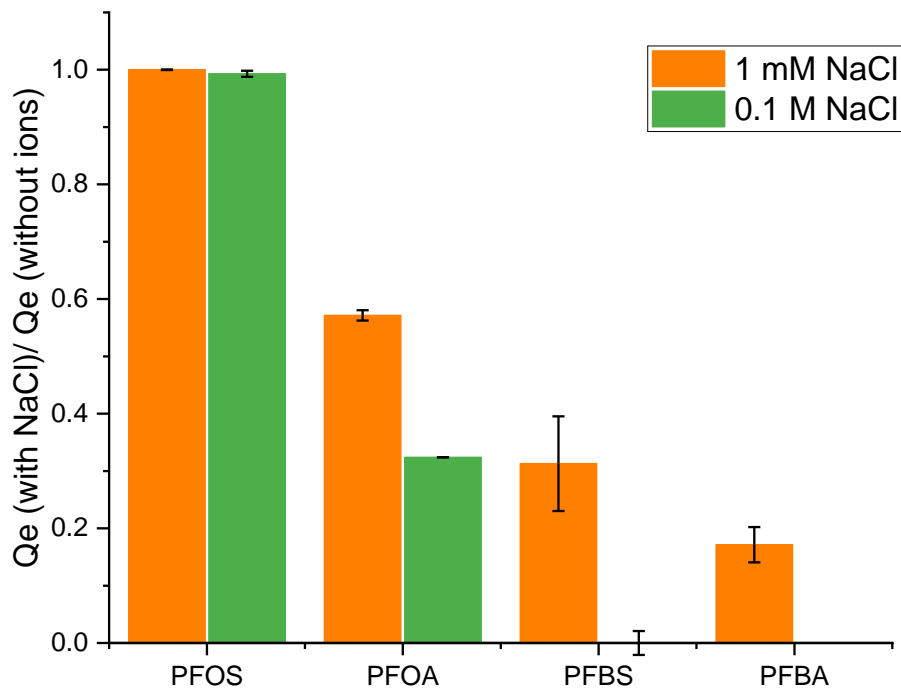

**Figure S4.** NaCl ion test for four different PFASs on QNC. (For PFOS/PFOA,  $C_o = 2$  ppm, QNC = 32 mg/L; for PFBS/PFBA,  $C_o = 10$  ppm, QNC = 320 mg/L)

**Table S1.** Basic information for the ground water sample in Long Island, NY

| Water quality parameter                  | Long Island groundwater |
|------------------------------------------|-------------------------|
| Conductivity ( $\mu\text{S}/\text{cm}$ ) | 25.8                    |
| ORP (mV)                                 | 117                     |
| Chloride (mg/L)                          | 7.3                     |
| Sulfate (mg/L)                           | 6.09                    |
| Total Organic Carbon (mg C/L)            | 2.59                    |
| Ammonia (mg N/L)                         | 0.03                    |
| TKN (mg N/L)                             | BDL                     |
| Nitrate + Nitrite (mg N/L)               | 0.57                    |
| Nitrite (mg N/L)                         | 0.01                    |
| Orthophosphate (mg P/L)                  | BDL                     |



**Table S2.** The PFAS quantitatively analysis results using the ground water (GW) samples.

| PFAS Compound    | GW Background (µg/L) | GW with 32 mg/L Gel (µg/L) | GW with 80 mg/L Gel (µg/L) | GW with 160 mg/L Gel (µg/L) | GW with 320 mg/L Gel (µg/L) | GW with 640 mg/L Gel (µg/L) |
|------------------|----------------------|----------------------------|----------------------------|-----------------------------|-----------------------------|-----------------------------|
| PFBA (C3)        | 0.153                | 0.142                      | 0.149                      | 0.153                       | 0.168                       | 0.169                       |
| PFPeA (C4)       | 0.321                | 0.301                      | 0.300                      | 0.299                       | 0.316                       | 0.298                       |
| PFBS (C4)        | 0.675                | 0.589                      | 0.588                      | 0.477                       | 0.513                       | 0.396                       |
| 4-2FTS (C4)      | 0.037                | 0.032                      | 0.028                      | 0.026                       | 0.025                       | 0.020                       |
| PFHxA (C5)       | 1.357                | 1.130                      | 1.087                      | 0.955                       | 0.937                       | 0.704                       |
| PFPeS (C5)       | 0.736                | 0.360                      | 0.281                      | 0.134                       | 0.061                       | 0.035                       |
| PFHpA (C6)       | 0.184                | 0.073                      | 0.063                      | 0.031                       | <b>&lt;0.010</b>            | <b>&lt;0.010</b>            |
| PFHxS-total (C6) | 3.449                | 0.200                      | 0.172                      | 0.059                       | 0.040                       | <b>&lt;0.010</b>            |
| 6-2FTS (C6)      | 0.891                | 0.036                      | 0.034                      | 0.012                       | <b>&lt;0.010</b>            | <b>&lt;0.010</b>            |
| PFOA (C7)        | 0.211                | <b>&lt;0.010</b>           | <b>&lt;0.010</b>           | <b>&lt;0.010</b>            | <b>&lt;0.010</b>            | <b>&lt;0.010</b>            |
| PFHpS (C7)       | 0.094                | <b>&lt;0.010</b>           | <b>&lt;0.010</b>           | <b>&lt;0.010</b>            | <b>&lt;0.010</b>            | <b>&lt;0.010</b>            |
| PFOS-total (C8)  | 3.578                | 0.032                      | 0.028                      | 0.029                       | 0.030                       | 0.029                       |
| 8-2FTS (C8)      | 0.038                | <b>&lt;0.010</b>           | <b>&lt;0.010</b>           | <b>&lt;0.010</b>            | <b>&lt;0.010</b>            | <b>&lt;0.010</b>            |

\*The bold face number means the value was below the detection limit of the LC-MS instrument as 0.01 µg/L.

**Table S3.** LC-MS/MS operating conditions and corresponding parameters.

| <b><i>LC Experimental Conditions</i></b> |                                                                                                                                                                                                                                                                                                 |            |    |     |    |     |    |     |    |      |    |      |     |
|------------------------------------------|-------------------------------------------------------------------------------------------------------------------------------------------------------------------------------------------------------------------------------------------------------------------------------------------------|------------|----|-----|----|-----|----|-----|----|------|----|------|-----|
| <i>Parameter</i>                         | <i>Value</i>                                                                                                                                                                                                                                                                                    |            |    |     |    |     |    |     |    |      |    |      |     |
| LC                                       | Agilent G7120A 1290 Binary Pump<br>Agilent G7116A 1260 Multi-column Thermostat<br>Agilent G7167A 1260 Multi-sampler                                                                                                                                                                             |            |    |     |    |     |    |     |    |      |    |      |     |
| Analytical Column                        | Agilent ZOBRAx Eclipse Plus C18<br>3.0 x 50 mm, 1.8 $\mu$ m                                                                                                                                                                                                                                     |            |    |     |    |     |    |     |    |      |    |      |     |
| Delayed Column                           | Agilent ZOBRAx Eclipse Plus C18<br>4.6 x 50 mm, 3.5 $\mu$ m                                                                                                                                                                                                                                     |            |    |     |    |     |    |     |    |      |    |      |     |
| Column Temperature                       | 50 °C                                                                                                                                                                                                                                                                                           |            |    |     |    |     |    |     |    |      |    |      |     |
| Injection Volume                         | 5 $\mu$ L                                                                                                                                                                                                                                                                                       |            |    |     |    |     |    |     |    |      |    |      |     |
| Mobile Phase                             | (A) 5 mM Ammonium Acetate in Water<br>B() 100% Methanol                                                                                                                                                                                                                                         |            |    |     |    |     |    |     |    |      |    |      |     |
| Flow Rate                                | 0.4 mL/min                                                                                                                                                                                                                                                                                      |            |    |     |    |     |    |     |    |      |    |      |     |
| Gradient                                 | <table border="1"> <thead> <tr> <th>Time (min)</th> <th>%B</th> </tr> </thead> <tbody> <tr> <td>0.0</td> <td>10</td> </tr> <tr> <td>0.5</td> <td>10</td> </tr> <tr> <td>2.0</td> <td>30</td> </tr> <tr> <td>14.0</td> <td>95</td> </tr> <tr> <td>14.5</td> <td>100</td> </tr> </tbody> </table> | Time (min) | %B | 0.0 | 10 | 0.5 | 10 | 2.0 | 30 | 14.0 | 95 | 14.5 | 100 |
| Time (min)                               | %B                                                                                                                                                                                                                                                                                              |            |    |     |    |     |    |     |    |      |    |      |     |
| 0.0                                      | 10                                                                                                                                                                                                                                                                                              |            |    |     |    |     |    |     |    |      |    |      |     |
| 0.5                                      | 10                                                                                                                                                                                                                                                                                              |            |    |     |    |     |    |     |    |      |    |      |     |
| 2.0                                      | 30                                                                                                                                                                                                                                                                                              |            |    |     |    |     |    |     |    |      |    |      |     |
| 14.0                                     | 95                                                                                                                                                                                                                                                                                              |            |    |     |    |     |    |     |    |      |    |      |     |
| 14.5                                     | 100                                                                                                                                                                                                                                                                                             |            |    |     |    |     |    |     |    |      |    |      |     |
| Stop Time                                | 16.5 min                                                                                                                                                                                                                                                                                        |            |    |     |    |     |    |     |    |      |    |      |     |
| Post Time                                | 6 min                                                                                                                                                                                                                                                                                           |            |    |     |    |     |    |     |    |      |    |      |     |
| <b><i>MS Instrument Conditions</i></b>   |                                                                                                                                                                                                                                                                                                 |            |    |     |    |     |    |     |    |      |    |      |     |
| <i>Parameter</i>                         | <i>Value</i>                                                                                                                                                                                                                                                                                    |            |    |     |    |     |    |     |    |      |    |      |     |
| MS                                       | Agilent 6495 Triple Quadrupole MS/MS<br>Agilent Jet Stream ESI source                                                                                                                                                                                                                           |            |    |     |    |     |    |     |    |      |    |      |     |
| Gas Temperature                          | 175 °C                                                                                                                                                                                                                                                                                          |            |    |     |    |     |    |     |    |      |    |      |     |
| Gas Flow                                 | 17 L/min                                                                                                                                                                                                                                                                                        |            |    |     |    |     |    |     |    |      |    |      |     |
| Nebulizer                                | 20 psi                                                                                                                                                                                                                                                                                          |            |    |     |    |     |    |     |    |      |    |      |     |
| Sheath Gas Temperature                   | 275 °C                                                                                                                                                                                                                                                                                          |            |    |     |    |     |    |     |    |      |    |      |     |
| Sheath Gas Flow                          | 11 L/min                                                                                                                                                                                                                                                                                        |            |    |     |    |     |    |     |    |      |    |      |     |
| Capillary Voltage (Neg)                  | 2500 V                                                                                                                                                                                                                                                                                          |            |    |     |    |     |    |     |    |      |    |      |     |
| Nozzle Voltage (Neg)                     | 0 V                                                                                                                                                                                                                                                                                             |            |    |     |    |     |    |     |    |      |    |      |     |
| iFunnel                                  |                                                                                                                                                                                                                                                                                                 |            |    |     |    |     |    |     |    |      |    |      |     |
| High Pressure RF (Neg)                   | 90 V                                                                                                                                                                                                                                                                                            |            |    |     |    |     |    |     |    |      |    |      |     |
| Low Pressure RF (Neg)                    | 40 V                                                                                                                                                                                                                                                                                            |            |    |     |    |     |    |     |    |      |    |      |     |

**Table S4.** Precursor and product ions of PFAS: (a) native compounds and (b) corresponding internal standards. Product ion 1 is for quantification and product ion 2 is for confirmation.

(a)

| #  | PFAS Analyte | Compound Name                             | Precursor (m/z) | Product 1 (m/z) | Product 2 (m/z) | Isotopically Labeled Internal Standard |
|----|--------------|-------------------------------------------|-----------------|-----------------|-----------------|----------------------------------------|
| 1  | PFBA         | Perfluorobutanoic acid                    | 213             | 169             | -               | <sup>13</sup> C <sub>4</sub> -PFBA     |
| 2  | PFPeA        | Perfluoropentanoic acid                   | 263             | 219             | -               | <sup>13</sup> C <sub>5</sub> -PFPeA    |
| 3  | PFBS         | Perfluorobutanesulfonic acid              | 299             | 80              | 99              | <sup>13</sup> C <sub>3</sub> -PFBS     |
| 4  | PFHxA        | Perfluorohexanoic acid                    | 313             | 269             | 119             | <sup>13</sup> C <sub>5</sub> -PFHxA    |
| 5  | 4:2 FTS      | 1H,1H,2H,2H-Perfluorohexane sulfonic acid | 327             | 307             | 81              | <sup>13</sup> C <sub>2</sub> -4:2FTS   |
| 6  | PFPeS        | Perfluoropentanesulfonic acid             | 349             | 80              | 99              | <sup>13</sup> C <sub>3</sub> -PFHxS    |
| 7  | PFHpA        | Perfluoroheptanoic acid                   | 363             | 319             | 169             | <sup>13</sup> C <sub>4</sub> -PFHpA    |
| 8  | PFHxS        | Perfluorohexanesulfonic acid              | 399             | 80              | 99              | <sup>13</sup> C <sub>3</sub> -PFHxS    |
| 9  | PFOA         | Perfluorooctanoic acid                    | 413             | 369             | 169             | <sup>13</sup> C <sub>8</sub> -PFOA     |
| 10 | 6:2 FTS      | 1H,1H,2H,2H-Perfluorooctane sulfonic acid | 427             | 407             | 81              | <sup>13</sup> C <sub>2</sub> -6:2FTS   |
| 11 | PFHpS        | Perfluoroheptanesulfonic acid             | 449             | 80              | 99              | <sup>13</sup> C <sub>8</sub> -PFOS     |
| 12 | PFOS         | Perfluorooctanesulfonic acid              | 499             | 80              | 99              | <sup>13</sup> C <sub>8</sub> -PFOS     |
| 13 | 8:2 FTS      | 1H,1H,2H,2H-Perfluorodecane sulfonic acid | 527             | 507             | 81              | <sup>13</sup> C <sub>2</sub> -8:2FTS   |

(b)

| #  | PFAS Isotope                         | Compound Name                                                                        | Precursor (m/z) | Product 1 (m/z) |
|----|--------------------------------------|--------------------------------------------------------------------------------------|-----------------|-----------------|
| 1  | <sup>13</sup> C <sub>4</sub> -PFBA   | Perfluoro-n-[1,2,3,4- <sup>13</sup> C <sub>4</sub> ]butanoic acid                    | 217             | 172             |
| 2  | <sup>13</sup> C <sub>5</sub> -PFPeA  | Perfluoro-n-[1,2,3,4,5- <sup>13</sup> C <sub>5</sub> ]pentanoic acid                 | 268             | 223             |
| 3  | <sup>13</sup> C <sub>3</sub> -PFBS   | Sodium perfluoro-1-[2,3,4- <sup>13</sup> C <sub>3</sub> ]butanesulfonate             | 302             | 80              |
| 4  | <sup>13</sup> C <sub>5</sub> -PFHxA  | Perfluoro-n-[1,2,3,4,6- <sup>13</sup> C <sub>5</sub> ]hexanoic acid                  | 318             | 273             |
| 5  | <sup>13</sup> C <sub>2</sub> -4:2FTS | Sodium 1H,1H,2H,2H-perfluoro-1-[1,2- <sup>13</sup> C <sub>2</sub> ]hexane sulfonate  | 329             | 309             |
| 6  | <sup>13</sup> C <sub>4</sub> -PFHpA  | Perfluoro-n-[1,2,3,4- <sup>13</sup> C <sub>4</sub> ]heptanoic acid                   | 367             | 322             |
| 7  | <sup>13</sup> C <sub>3</sub> -PFHxS  | Sodium perfluoro-1-[1,2,3- <sup>13</sup> C <sub>3</sub> ]hexanesulfonate             | 402             | 80              |
| 8  | <sup>13</sup> C <sub>8</sub> -PFOA   | Perfluoro-n-[ <sup>13</sup> C <sub>8</sub> ]octanoic acid                            | 421             | 376             |
| 9  | <sup>13</sup> C <sub>2</sub> -6:2FTS | Sodium 1H,1H,2H,2H-perfluoro-1-[1,2- <sup>13</sup> C <sub>2</sub> ]-octane sulfonate | 429             | 409             |
| 10 | <sup>13</sup> C <sub>8</sub> -PFOS   | Sodium perfluoro-[ <sup>13</sup> C <sub>8</sub> ]octanesulfonate                     | 507             | 80              |
| 11 | <sup>13</sup> C <sub>2</sub> -8:2FTS | Sodium 1H,1H,2H,2H-perfluoro-1-[1,2- <sup>13</sup> C <sub>2</sub> ]-decane sulfonate | 529             | 509             |

**Table S5.** The kinetic data for (a) PFOA (the initial con. of PFOA  $\approx$  2 mg/L); QNC 12:1 amount = 0.32 mg (32 mg/L); (b) PFBA (the initial con. of PFBA  $\approx$  10 mg/L); QNC 12:1 amount = 3.2 mg (320 mg/L); (c) PFOS (the initial con. of PFOS  $\approx$  5 mg/L); QNC 12:1 amount = 0.32 mg (32 mg/L); (d) PFBS (the initial con. of PFBS  $\approx$  10 mg/L); QNC 12:1 amount = 3.2 mg (320 mg/L).

(a)

| Time   | Batch 1 $C_e$<br>(mg/L) | Batch 2 $C_e$<br>(mg/L) | Average $C_e$<br>(mg/L) | $Q_e$ (mg/g) | Error Bar<br>for $Q_e$<br>(mg/g) |
|--------|-------------------------|-------------------------|-------------------------|--------------|----------------------------------|
| 1 min  | 0.98                    | 0.80                    | 0.89                    | 34.09        | 3.34                             |
| 2 min  | 0.76                    | 0.71                    | 0.74                    | 39.71        | 0.77                             |
| 3 min  | 0.67                    | 0.60                    | 0.63                    | 43.38        | 1.19                             |
| 5 min  | 0.53                    | 0.52                    | 0.52                    | 47.44        | 0.23                             |
| 15 min | 0.42                    | 0.41                    | 0.42                    | 51.34        | 0.19                             |
| 1 h    | 0.39                    | 0.39                    | 0.39                    | 52.49        | 0.05                             |
| 2 h    | 0.34                    | 0.29                    | 0.32                    | 55.10        | 0.77                             |
| 4 h    | 0.32                    | 0.27                    | 0.30                    | 55.81        | 0.78                             |
| 9 h    | 0.25                    | 0.28                    | 0.27                    | 56.80        | 0.57                             |
| 24 h   | 0.23                    | 0.25                    | 0.24                    | 57.96        | 0.34                             |

(b)

| Time   | Batch 1 $C_e$<br>(mg/L) | Batch 2 $C_e$<br>(mg/L) | Average $C_e$<br>(mg/L) | $Q_e$ (mg/g) | Error Bar<br>for $Q_e$<br>(mg/g) |
|--------|-------------------------|-------------------------|-------------------------|--------------|----------------------------------|
| 1 min  | 3.93                    | 3.68                    | 3.81                    | 20.04        | 0.39                             |
| 3 min  | 4.81                    | 3.81                    | 4.31                    | 18.47        | 1.56                             |
| 5 min  | 4.43                    | 3.81                    | 4.12                    | 19.06        | 0.97                             |
| 15 min | 4.61                    | 4.48                    | 4.54                    | 17.74        | 0.20                             |
| 1 h    | 4.07                    | 3.98                    | 4.02                    | 19.36        | 0.15                             |
| 2 h    | 4.66                    | 4.28                    | 4.47                    | 17.97        | 0.58                             |
| 4 h    | 4.46                    | 4.13                    | 4.30                    | 18.51        | 0.52                             |
| 9 h    | 4.38                    | 4.26                    | 4.32                    | 18.44        | 0.19                             |
| 24 h   | 4.41                    | 4.27                    | 4.34                    | 18.38        | 0.22                             |

(c)

| <b>Time</b> | <b>Batch 1 <math>C_e</math><br/>(mg/L)</b> | <b>Batch 2 <math>C_e</math><br/>(mg/L)</b> | <b>Average <math>C_e</math><br/>(mg/L)</b> | <b><math>Q_e</math> (mg/g)</b> | <b>Error Bar<br/>for <math>Q_e</math><br/>(mg/g)</b> |
|-------------|--------------------------------------------|--------------------------------------------|--------------------------------------------|--------------------------------|------------------------------------------------------|
| 1 min       | 0.085                                      | 0.037                                      | 0.061                                      | 185.59                         | 1.91                                                 |
| 3 min       | 0.036                                      | 0.034                                      | 0.035                                      | 186.41                         | 1.09                                                 |
| 5 min       | 0.052                                      | 0.063                                      | 0.057                                      | 185.71                         | 1.79                                                 |
| 15 min      | 0.028                                      | 0.050                                      | 0.039                                      | 186.29                         | 1.21                                                 |
| 1 h         | 0.015                                      | 0.017                                      | 0.016                                      | 187.00                         | 0.50                                                 |
| 2 h         | 0.008                                      | 0.016                                      | 0.012                                      | 187.11                         | 0.39                                                 |
| 6 h         | 0.006                                      | 0.006                                      | 0.006                                      | 187.31                         | 0.19                                                 |
| 24 h        | 0.012                                      | 0.014                                      | 0.013                                      | 187.10                         | 0.40                                                 |

(d)

| <b>Time</b> | <b>Batch 1 <math>C_e</math><br/>(mg/L)</b> | <b>Batch 2 <math>C_e</math><br/>(mg/L)</b> | <b>Average <math>C_e</math><br/>(mg/L)</b> | <b><math>Q_e</math> (mg/g)</b> | <b>Error Bar<br/>for <math>Q_e</math><br/>(mg/g)</b> |
|-------------|--------------------------------------------|--------------------------------------------|--------------------------------------------|--------------------------------|------------------------------------------------------|
| 1 min       | 3.68                                       | 3.53                                       | 3.60                                       | 20.11                          | 0.23                                                 |
| 3 min       | 3.18                                       | 3.02                                       | 3.10                                       | 21.68                          | 0.25                                                 |
| 5 min       | 3.01                                       | 3.08                                       | 3.05                                       | 21.86                          | 0.10                                                 |
| 15 min      | 2.96                                       | 2.92                                       | 2.94                                       | 22.19                          | 0.07                                                 |
| 1 h         | 3.10                                       | 2.74                                       | 2.92                                       | 22.24                          | 0.57                                                 |
| 2 h         | 3.54                                       | 3.54                                       | 3.54                                       | 20.31                          | 0.00                                                 |
| 4 h         | 3.07                                       | 2.83                                       | 2.95                                       | 22.15                          | 0.38                                                 |
| 9 h         | 2.85                                       | 2.96                                       | 2.90                                       | 22.30                          | 0.18                                                 |
| 24 h        | 3.01                                       | 3.30                                       | 3.16                                       | 21.51                          | 0.46                                                 |

**Table S6.** The isotherm data for (a) PFOA (Initial con. of PFOA  $\approx$  1-50 mg/L); QNC 12:1 amount = 0.32 mg (32 mg/L); equilibrium time = 24 hrs; (b) PFBA (Initial con. of PFBA  $\approx$  1-100 mg/L; QNC 12:1 amount = 3.2 mg (320 mg/L); equilibrium time 24 hrs; (c) PFOS (Initial con. of PFBS  $\approx$  1-50 mg/L; QNC 12:1 amount = 0.32 mg (32 mg/L); equilibrium time 24 hrs; PFBS (Initial con. of PFBS  $\approx$  1-250 mg/L; QNC 12:1 amount = 3.2 mg (320 mg/L); equilibrium time = 24 hrs.

(a)

| <b>Initial Concentration <math>C_o</math> (mg/L)</b> | <b>Batch 1 <math>C_e</math> (mg/L)</b> | <b>Batch 2 <math>C_e</math> (mg/L)</b> | <b>Average <math>C_e</math> (mg/L)</b> | <b><math>Q_e</math> (mg/g)</b> | <b>Error bar for <math>Q_e</math> (mg/g)</b> |
|------------------------------------------------------|----------------------------------------|----------------------------------------|----------------------------------------|--------------------------------|----------------------------------------------|
| 1.01                                                 | 0.24                                   | 0.21                                   | 0.22                                   | 28.74                          | 0.61                                         |
| 2.91                                                 | 0.35                                   | 0.55                                   | 0.45                                   | 90.28                          | 3.80                                         |
| 5.65                                                 | 0.54                                   | 0.39                                   | 0.46                                   | 190.27                         | 2.65                                         |
| 8.58                                                 | 0.37                                   | 0.37                                   | 0.37                                   | 301.23                         | 0.07                                         |
| 10.71                                                | 0.99                                   | 0.83                                   | 0.91                                   | 359.38                         | 2.99                                         |
| 16.48                                                | 5.81                                   | 6.46                                   | 6.13                                   | 379.54                         | 12.02                                        |
| 21.86                                                | 9.64                                   | 10.23                                  | 9.93                                   | 380.21                         | 9.37                                         |
| 22.09                                                | 12.50                                  | 11.93                                  | 12.21                                  | 362.20                         | 10.43                                        |
| 27.78                                                | 17.07                                  | 16.68                                  | 16.88                                  | 399.75                         | 7.07                                         |
| 44.09                                                | 32.42                                  | 31.84                                  | 32.13                                  | 388.83                         | 9.40                                         |

(b)

| <b>Initial Concentration <math>C_o</math> (mg/L)</b> | <b>Batch 1 <math>C_e</math> (mg/L)</b> | <b>Batch 2 <math>C_e</math> (mg/L)</b> | <b>Average <math>C_e</math> (mg/L)</b> | <b><math>Q_e</math> (mg/g)</b> | <b>Error bar for <math>Q_e</math> (mg/g)</b> |
|------------------------------------------------------|----------------------------------------|----------------------------------------|----------------------------------------|--------------------------------|----------------------------------------------|
| 6.44                                                 | 3.52                                   | 3.08                                   | 3.30                                   | 9.79                           | 0.69                                         |
| 12.45                                                | 5.62                                   | 6.34                                   | 5.98                                   | 20.22                          | 1.13                                         |
| 16.56                                                | 5.94                                   | 5.61                                   | 5.78                                   | 33.70                          | 0.52                                         |
| 22.95                                                | 8.25                                   | 7.72                                   | 7.99                                   | 46.77                          | 0.82                                         |
| 34.67                                                | 10.94                                  | 9.95                                   | 10.44                                  | 75.72                          | 1.54                                         |
| 60.32                                                | 28.95                                  | 29.14                                  | 29.05                                  | 97.74                          | 0.29                                         |
| 73.09                                                | 39.68                                  | 38.60                                  | 39.14                                  | 106.11                         | 1.68                                         |
| 89.39                                                | 55.21                                  | 61.17                                  | 58.19                                  | 97.49                          | 9.31                                         |
| 118.27                                               | 88.96                                  | 88.89                                  | 88.92                                  | 91.71                          | 0.12                                         |

(c)

| <b>Initial Concentration <math>C_o</math> (mg/L)</b> | <b>Batch 1 <math>C_e</math> (mg/L)</b> | <b>Batch 2 <math>C_e</math> (mg/L)</b> | <b>Average <math>C_e</math> (mg/L)</b> | <b><math>Q_e</math> (mg/g)</b> | <b>Error bar for <math>Q_e</math> (mg/g)</b> |
|------------------------------------------------------|----------------------------------------|----------------------------------------|----------------------------------------|--------------------------------|----------------------------------------------|
| 1.34                                                 | 0.07                                   | 0.25                                   | 0.16                                   | 37.01                          | 2.75                                         |
| 3.32                                                 | 0.11                                   | 0.15                                   | 0.13                                   | 99.49                          | 0.55                                         |
| 5.93                                                 | 0.08                                   | 0.09                                   | 0.09                                   | 182.69                         | 0.05                                         |
| 8.63                                                 | 0.06                                   | 0.07                                   | 0.07                                   | 267.64                         | 0.06                                         |
| 10.93                                                | 0.16                                   | 0.36                                   | 0.26                                   | 333.59                         | 3.18                                         |
| 17.10                                                | 0.97                                   | 0.98                                   | 0.98                                   | 503.83                         | 0.16                                         |
| 20.33                                                | 3.27                                   | 2.76                                   | 3.02                                   | 551.84                         | 8.23                                         |
| 29.39                                                | 11.53                                  | 12.19                                  | 11.86                                  | 564.28                         | 10.64                                        |
| 42.85                                                | 26.12                                  | 25.96                                  | 26.04                                  | 551.53                         | 2.69                                         |
| 45.69                                                | 29.89                                  | 28.40                                  | 29.14                                  | 542.84                         | 24.34                                        |

(d)

| <b>Initial Concentration <math>C_o</math> (mg/L)</b> | <b>Batch 1 <math>C_e</math> (mg/L)</b> | <b>Batch 2 <math>C_e</math> (mg/L)</b> | <b>Average <math>C_e</math> (mg/L)</b> | <b><math>Q_e</math> (mg/g)</b> | <b>Error bar for <math>Q_e</math> (mg/g)</b> |
|------------------------------------------------------|----------------------------------------|----------------------------------------|----------------------------------------|--------------------------------|----------------------------------------------|
| 5.83                                                 | 1.69                                   | 1.54                                   | 1.62                                   | 13.16                          | 0.24                                         |
| 11.87                                                | 3.23                                   | 3.04                                   | 3.14                                   | 27.30                          | 0.30                                         |
| 16.20                                                | 4.45                                   | 4.18                                   | 4.32                                   | 37.14                          | 0.42                                         |
| 24.38                                                | 6.08                                   | 5.65                                   | 5.87                                   | 57.87                          | 0.67                                         |
| 33.13                                                | 7.63                                   | 8.36                                   | 8.00                                   | 78.54                          | 1.13                                         |
| 57.96                                                | 13.43                                  | 13.68                                  | 13.56                                  | 138.77                         | 0.39                                         |
| 84.63                                                | 28.60                                  | 30.23                                  | 29.41                                  | 172.54                         | 2.54                                         |
| 122.48                                               | 52.17                                  | 47.88                                  | 50.02                                  | 226.44                         | 6.70                                         |
| 156.00                                               | 86.69                                  | 77.34                                  | 82.01                                  | 231.21                         | 14.61                                        |
| 195.49                                               | 109.78                                 | 97.46                                  | 103.62                                 | 287.11                         | 19.24                                        |
| 243.39                                               | 157.48                                 | 167.84                                 | 162.66                                 | 258.60                         | 16.59                                        |



**Table S7.** The displacement study for (a) PFBS/PFOS system (the initial con of PFAS  $\approx$  60 mg/L; QNC 12:1 amount = 0.16 mg (160 mg/L)). PFBS added to the adsorbent, which was equilibrated for 24 hrs. PFOS was added at time = 0 min; (b) PFBA/PFOA system (the initial con of PFAS  $\approx$  60 mg/L; QNC 12:1 amount = 0.16 mg (160 mg/L); PFBA added to the adsorbent, which was equilibrated for 24 hrs. PFOA was added at time = 0 min.

(a)

| Time   | $C_e$ of PFBS (mg/L) | $Q_e$ (mg/g) | Deviation | $C_e$ of PFOS (mg/L) | $Q_e$ (mg/g) | Deviation |
|--------|----------------------|--------------|-----------|----------------------|--------------|-----------|
| 0 min  | 28.21                | 203.88       | 1.51      | 51.65                | 0            | 0         |
| 1 min  | 49.20                | 72.69        | 6.72      | 2.62                 | 306.43       | 2.48      |
| 3 min  | 48.78                | 75.31        | 17.12     | 1.95                 | 310.63       | 1.97      |
| 5 min  | 50.00                | 67.71        | 7.56      | 1.98                 | 310.47       | 0.85      |
| 15 min | 50.46                | 64.82        | 1.57      | 1.26                 | 314.95       | 0.62      |
| 1 h    | 50.47                | 64.73        | 2.02      | 0.79                 | 317.87       | 0.82      |
| 2 h    | 49.49                | 70.84        | 3.07      | 0.80                 | 317.81       | 0.59      |
| 4 h    | 50.58                | 64.08        | 4.29      | 0.92                 | 317.07       | 0.18      |
| 24 h   | 49.34                | 71.78        | 3.36      | 1.02                 | 316.46       | 0.25      |

(b)

| Time   | $C_e$ of PFBS (mg/L) | $Q_e$ (mg/g) | Deviation | $C_e$ of PFOS (mg/L) | $Q_e$ (mg/g) | Deviation |
|--------|----------------------|--------------|-----------|----------------------|--------------|-----------|
| 0 s    | 44.71                | 128.07       | 6.18      | 71.40                | 0            | 0         |
| 30 s   | 54.54                | 66.65        | 1.02      | 30.56                | 255.27       | 10.14     |
| 60 s   | 60.53                | 29.17        | 0         | 28.18                | 270.13       | 5.11      |
| 90 s   | 53.38                | 73.90        | 6.83      | 24.21                | 294.91       | 18.44     |
| 10 min | 54.63                | 66.07        | 0.67      | 20.94                | 315.40       | 5.90      |
| 1 h    | 55.40                | 61.23        | 3.87      | 18.92                | 328.00       | 1.85      |
| 6 h    | 57.54                | 47.87        | 2.16      | 18.01                | 333.71       | 6.18      |
| 24 h   | 56.44                | 54.75        | 1.92      | 17.97                | 333.91       | 14.72     |

**Table S8.** The competitive study for (a) PFBS/PFOS system (the initial con of PFAS  $\approx$  60 mg/L; QNC 12:1 amount = 0.16 mg (160 mg/L)). Single-solute means adsorbent was mixed with PFBS or PFOS individually. Bi-solute means PFBS and PFOS were added together to the adsorbent; (b) PFBA/PFOA system (the initial con of PFAA  $\approx$  60 mg/L; QNC 12:1 amount = 0.16 mg (160 mg/L)). Single-solute means adsorbent was mixed with PFBA or PFOA individually. Bi-solute means PFBA and PFOA were added together to the adsorbent.

(a)

| Time                 | $C_e$ of PFBS (mg/L) | $Q_e$ (mg/g) | $C_e$ of PFOS (mg/L) | $Q_e$ (mg/g) |
|----------------------|----------------------|--------------|----------------------|--------------|
| <b>Single-solute</b> |                      |              |                      |              |
| 30 s                 | 34.86                | 130.26       | 0.83                 | 300.45       |
| 60 s                 | 33.80                | 136.86       | 0.83                 | 300.47       |
| 90 s                 | 32.14                | 147.26       | 0.75                 | 300.92       |
| 10 min               | 31.91                | 148.70       | 0.51                 | 302.46       |
| 1 h                  | 30.73                | 156.09       | 1.94                 | 293.53       |
| 6 h                  | 33.02                | 141.73       | 0.26                 | 304.02       |
| 24 h                 | 29.62                | 163.00       | 0.16                 | 304.64       |
| <b>Bi-solute</b>     |                      |              |                      |              |
| 30 s                 | 52.67                | 18.91        | 2.73                 | 288.57       |
| 60 s                 | 49.71                | 37.46        | 1.67                 | 295.18       |
| 90 s                 | 49.03                | 41.66        | 0.98                 | 299.52       |
| 10 min               | 50.87                | 30.19        | 0.71                 | 301.20       |
| 1 h                  | 50.61                | 31.84        | 0.38                 | 303.28       |
| 6 h                  | 47.80                | 49.38        | 0.19                 | 304.47       |
| 24 h                 | 49.40                | 39.39        | 0.26                 | 303.97       |

(b)

| Time                 | $C_e$ of PFBS<br>(mg/L) | $Q_e$ (mg/g) | $C_e$ of PFOS<br>(mg/L) | $Q_e$ (mg/g) |
|----------------------|-------------------------|--------------|-------------------------|--------------|
| <b>Single-solute</b> |                         |              |                         |              |
| 30 s                 | 45.14                   | 125.38       | 17.99                   | 333.82       |
| 60 s                 | 38.84                   | 164.72       | 18.48                   | 330.73       |
| 90 s                 | 47.25                   | 112.17       | 18.55                   | 330.33       |
| 10 min               | 41.81                   | 146.22       | 14.74                   | 354.11       |
| 1 h                  | 48.11                   | 106.82       | 13.42                   | 362.37       |
| 6 h                  | 43.47                   | 135.80       | 9.30                    | 388.12       |
| 24 h                 | 43.37                   | 136.42       | 10.20                   | 382.48       |
| <b>Bi-solute</b>     |                         |              |                         |              |
| 30 s                 | 52.25                   | 80.96        | 26.15                   | 282.83       |
| 60 s                 | 53.16                   | 75.24        | 20.94                   | 315.39       |
| 90 s                 | 60.06                   | 32.09        | 22.15                   | 307.82       |
| 10 min               | 53.18                   | 75.10        | 16.72                   | 341.76       |
| 1 h                  | 55.69                   | 59.46        | 14.72                   | 354.23       |
| 6 h                  | 57.85                   | 45.97        | 11.45                   | 374.70       |
| 24 h                 | 53.78                   | 71.35        | 12.40                   | 368.77       |

**Table S9.** Adsorption experiment with 1 mM and 0.1M NaCl ion (PFAS concentrations: 2 mg/L for PFOS/PFOA with 32 mg/L QNC; 10 mg/L for PFBS/PFBA with 320 mg/L QNC)

|                  | <b>PFOS</b> | <b>PFOA</b> | <b>PFBS</b> | <b>PFBA</b> |
|------------------|-------------|-------------|-------------|-------------|
| $C_o$ (mg/L)     | 1.42        | 2.11        | 9.88        | 9           |
| $C_e$ (mg/L)     | 0.01        | 0.02        | 1.56        | 2.75        |
| $Q_e$ (mg/g)     | 46.94       | 69.42       | 27.71       | 20.82       |
| $C_e$ 1mM NaCl   | 0.01        | 0.29        | 6.22        | 6.2         |
| $Q_e$ 1mM NaCl   | 46.94       | 39.67       | 8.67        | 3.57        |
| $C_e$ 0.1 M NaCl | 0.02        | 1.43        | 10.22       | 10.44       |
| $Q_e$ 0.1 M NaCl | 46.61       | 22.49       | 0           | 0           |

### References

1. S. Park, J. O. Baker, M. E. Himmel, P. A. Parilla and D. K. Johnson, *Biotechnol Biofuels*, 2010, **3**, 10.
2. G. Sebe, F. Ham-Pichavant, E. Ibarboure, A. L. Koffi and P. Tingaut, *Biomacromolecules*, 2012, **13**, 570-578.
3. M. Hasani, E. D. Cranston, G. Westman and D. G. Gray, *Soft Matter*, 2008, **4**, 2238-2244.
